# Supplementary material
Source: publisher figshare collection journal article supplement (https://gsajournals.figshare.com/articles/dataset/_/13426079)
Supplement: Supplementary file 1 [file 1]

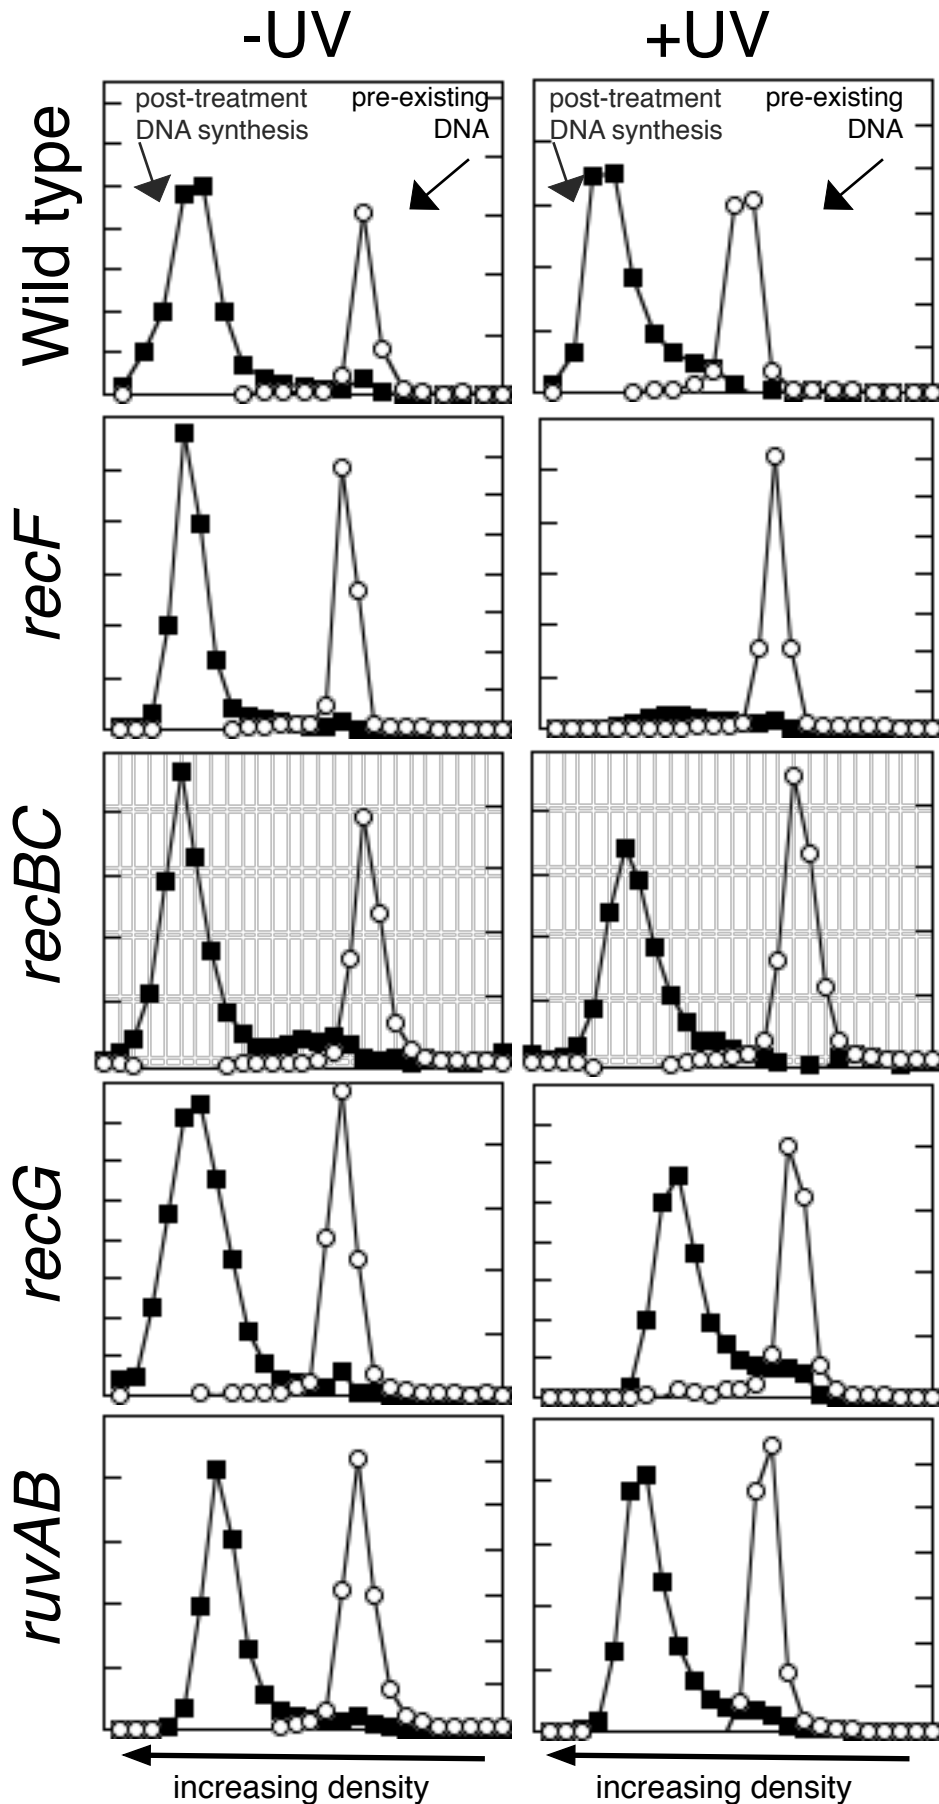

Figure S1. *The failure to restore replication forks disrupted by UV-induced damage is specific to the RecF pathway. Mutants lacking RecBCD, RecG, or RuvABC recover normally.* The amount of DNA synthesized during a 1 hour period in UV-irradiated (25 J/m<sup>2</sup>) or mock-irradiated cultures was determined by density labeling the DNA with 5-bromouracil and subsequent isolation in alkali CsCl gradients. (Open circles), DNA synthesized before treatment (14C); (Filled Squares), DNA synthesized following treatment (3H). The ratio of 3H and 14C axes was kept constant for each strain. Maximums were between 2500-12000cpm and 3500-7500cpm for 3H and 14C on all graphs, respectively. Data modified from (Donaldson et al., 2004; Wendel et al., 2014).
