# Supplementary material
Source: publisher figshare collection journal article supplement (https://gsajournals.figshare.com/articles/dataset/_/13426079)
Supplement: Supplementary file 2 [file 1]

## Supplemental References

Cole, J. M., J. D. Acott, C. T. Courcelle, and J. Courcelle, 2018 Limited Capacity or Involvement of Excision Repair, Double-Strand Breaks, or Translesion Synthesis for Psoralen Cross-Link Repair in. *Genetics* **210**: 99-112.

Courcelle, J., D. J. Crowley, and P. C. Hanawalt, 1999 Recovery of DNA replication in UV-irradiated *Escherichia coli* requires both excision repair and recF protein function. *J Bacteriol* **181**: 916-22.

Courcelle, J., J. R. Donaldson, K. H. Chow, and C. T. Courcelle, 2003 DNA Damage-Induced Replication Fork Regression and Processing in *Escherichia coli*. *Science* **299**: 1064-1067.

Courcelle, J., C. Carswell-Crumpton, and P. C. Hanawalt, 1997 recF and recR are required for the resumption of replication at DNA replication forks in *Escherichia coli*. *Proc Natl Acad Sci U S A* **94**: 3714-9.

Donaldson, J. R., C. T. Courcelle, and J. Courcelle, 2004 RuvAB and RecG Are Not Essential for the Recovery of DNA Synthesis Following UV-Induced DNA Damage in *Escherichia coli*. *Genetics* **166**: 1631-1640.

Mellon, I., and P. C. Hanawalt, 1989 Induction of the *Escherichia coli* lactose operon selectively increases repair of its transcribed DNA strand. *Nature* **342**: 95-98.

Wendel, B. M., C. T. Courcelle, and J. Courcelle, 2014 Completion of DNA replication in *Escherichia coli*. *Proc Natl Acad Sci U S A* **111**: 16454-16459.

Yu, D., H. M. Ellis, E. C. Lee, N. A. Jenkins, N. G. Copeland, and D. L. Court, 2000 An efficient recombination system for chromosome engineering in *Escherichia coli*. *Proc Natl Acad Sci U S A* **97**: 5978-5983.
