# Supplementary material
Source: publisher figshare collection journal article supplement (https://gsajournals.figshare.com/articles/dataset/_/13426079)
Supplement: Supplementary file 3 [file 1]

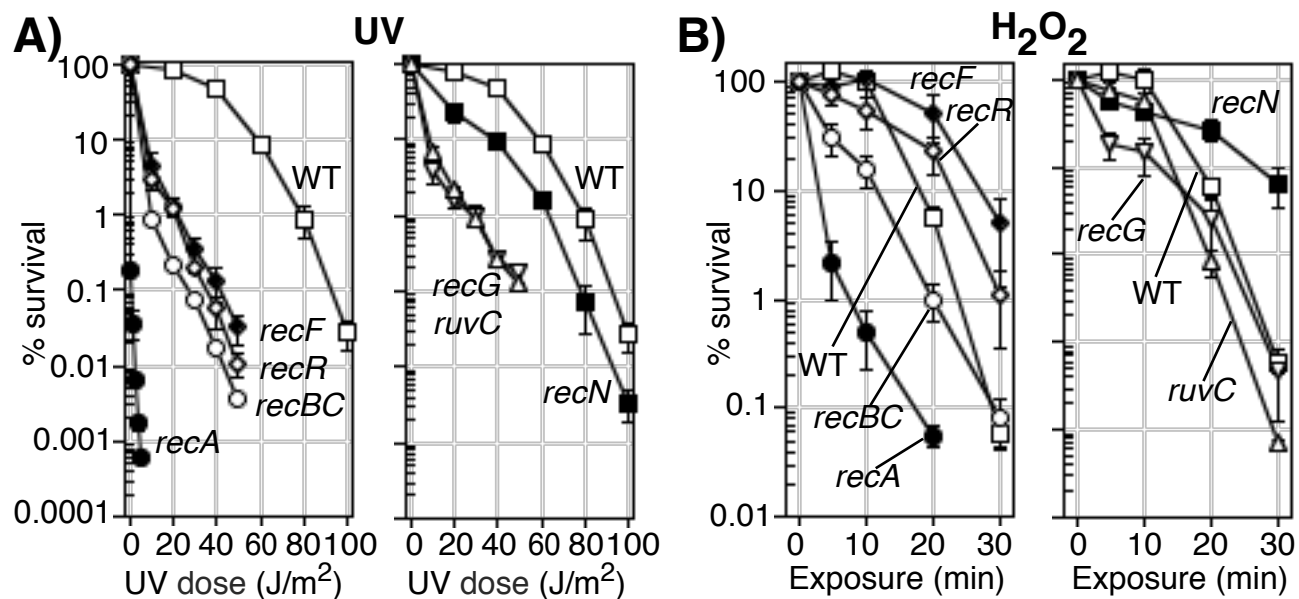

Figure S2. Mutants in the *recF* pathway are resistant to oxidative challenge. The survival of wild-type (open squares), *recA* (filled circles), *recBC* (open circles), *recF* (filled diamonds), *recR* (open diamonds), *recN* (filled squares), *recG* (open upside-down triangles) and *ruvC* (open triangles) cells following A) UV irradiation or B) 10 mM H<sub>2</sub>O<sub>2</sub> treatment is plotted.

Graphs represent the average of three independent experiments. Error bars represent one standard error of the mean.
