# Supplementary material
Source: publisher figshare collection journal article supplement (https://gsajournals.figshare.com/articles/dataset/_/13426079)
Supplement: Supplementary file 4 [file 1]

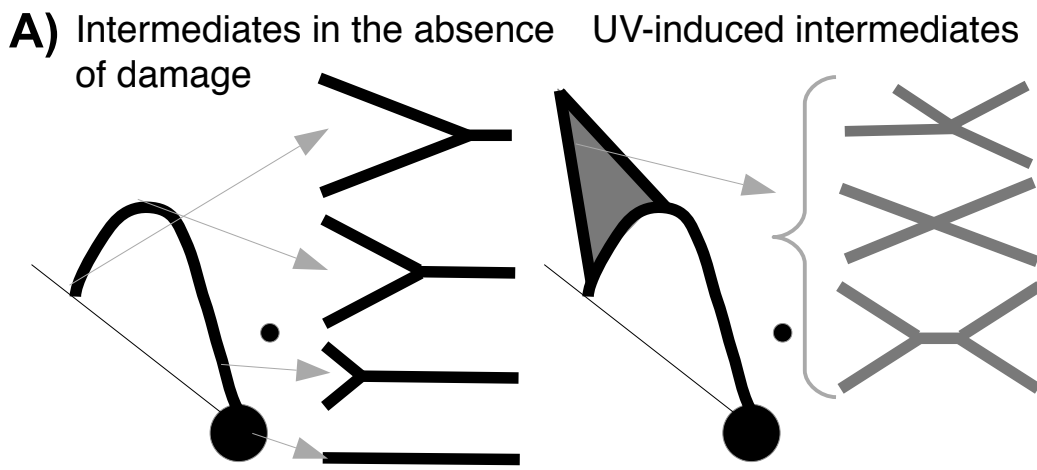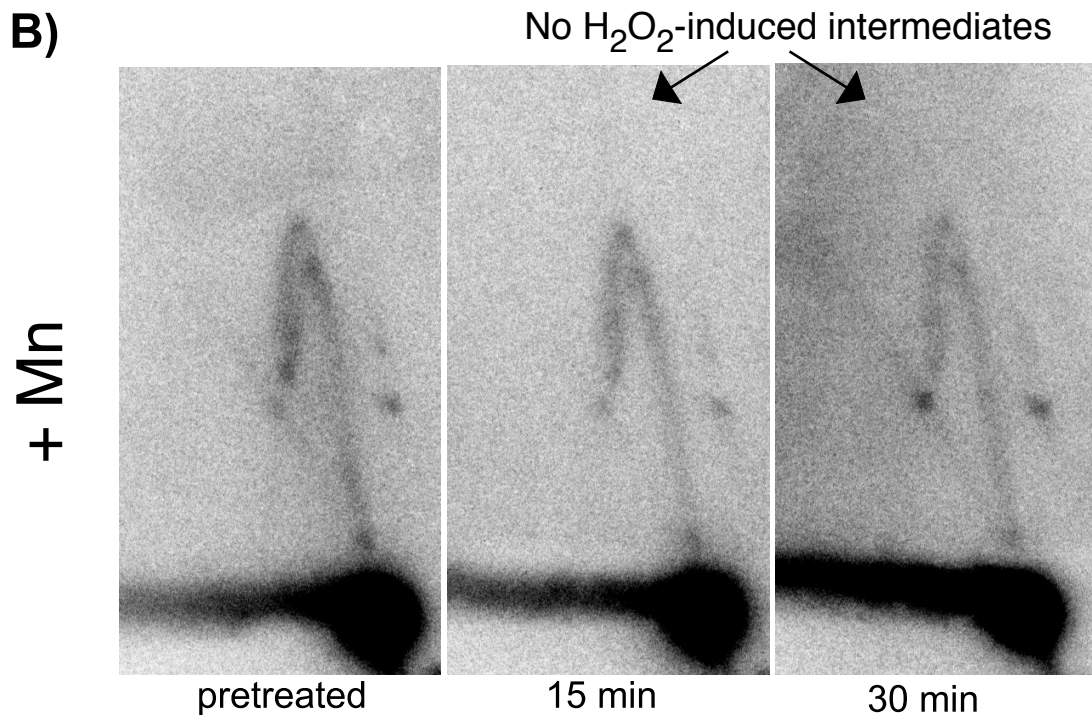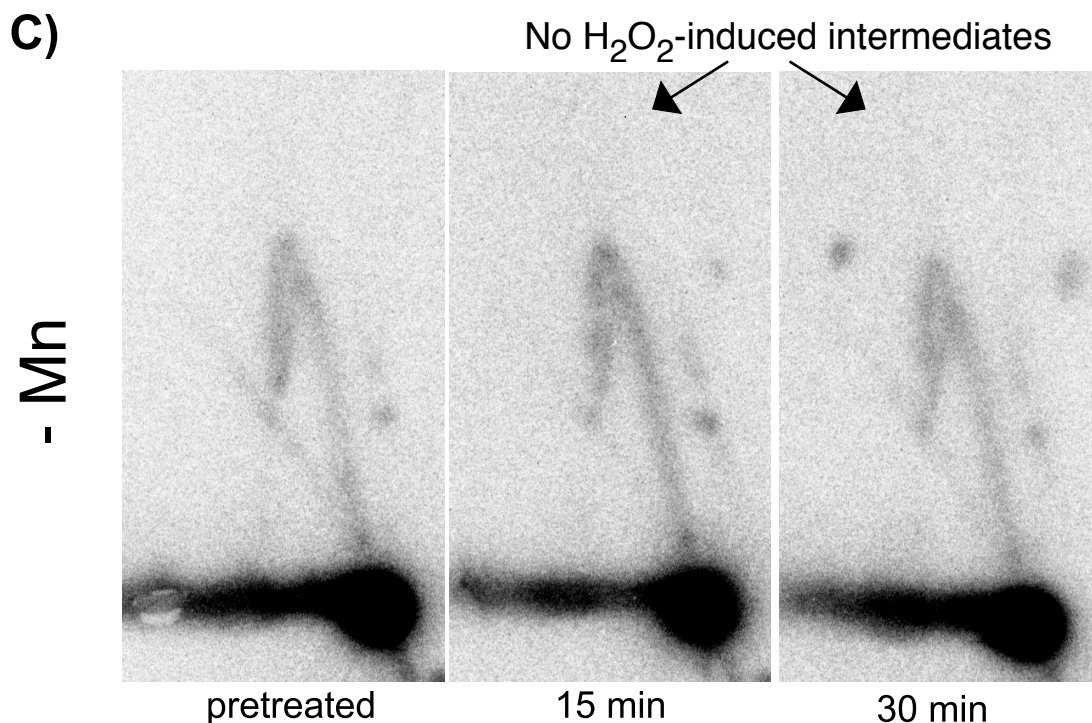

Figure S3. DNA damage-induced processing intermediates are not observed after  $\text{H}_2\text{O}_2$  treatment in the presence or absence of manganese. A) The migration pattern of PvuII-digested pBR322 plasmid DNA observed by 2D gel electrophoresis is diagrammed. Non-replicating plasmids run as a 4.4-kb linear fragment. Replicating plasmids form Y-shaped structures that migrate slower than non-replicating linear DNA and form an arc that extends from the linear region. Following replication disruption, double-Y or X-shaped intermediates are observed that migrate in the cone region behind the arc of Y-shaped molecules. B) 2D agarose gels of total DNA purified from wild-type cultures containing plasmid pBR322 and grown in the presence (B) or absence (C) of manganese and exposed to 10 mM  $\text{H}_2\text{O}_2$  for 5 min was prepared at the time indicated and probed with  $^{32}\text{P}$ -labeled pBR322.
