# Supplementary material
Source: publisher figshare collection journal article supplement (https://gsajournals.figshare.com/articles/dataset/_/13426079)
Supplement: Supplementary file 5 [file 1]

Table S1. *E. coli* K-12 strains used

| Strain                     | Relevant Genotype                                                                                                                        | Reference or Construction                                   |
|----------------------------|------------------------------------------------------------------------------------------------------------------------------------------|-------------------------------------------------------------|
| SR108                      | $\lambda^-$ , <i>thyA36</i> , <i>deoC2</i> , <i>IN(rrnD-rrnE)1</i> , <i>rph</i>                                                          | (Mellon and Hanawalt, 1989)                                 |
| DY329                      | $\Delta$ <i>lacU169</i> , <i>nadA::Tn10</i> , <i>gal490</i> , $\lambda$ <i>cI857</i> , $\Delta$ ( <i>cro-bioA</i> )                      | (Yu et al., 2000)                                           |
| CL1155                     | $\Delta$ <i>lacU169</i> , <i>nadA::Tn10</i> , <i>gal490</i> , $\lambda$ <i>cI857</i> , $\Delta$ ( <i>cro-bioA</i> ),<br><i>xthA::cat</i> | DY329 x PCR fragment ( <i>xthA</i> -<br><i>cat</i> primers) |
| Strains isogenic to SR108: |                                                                                                                                          |                                                             |
| HL921                      | <i>recA::Tn10</i>                                                                                                                        | (Courcelle et al., 1997)                                    |
| HL922                      | <i>recB21 recC22 argA81::Tn10</i>                                                                                                        | (Courcelle et al., 1997)                                    |
| HL952                      | <i>uvrA::Tn10</i>                                                                                                                        | (Courcelle et al., 1999)                                    |
| CL008                      | <i>recG258::Tn5</i>                                                                                                                      | (Donaldson et al., 2004)                                    |
| CL544                      | <i>recR6212::cat</i>                                                                                                                     | (Courcelle et al., 2003)                                    |
| CL577                      | <i>ruvC53eda-51::Tn10</i>                                                                                                                | (Donaldson et al., 2004)                                    |
| CL579                      | <i>recF6206::tet</i>                                                                                                                     | (Courcelle et al., 2003)                                    |
| CL915                      | <i>recN::cat</i>                                                                                                                         | (Cole et al., 2018)                                         |
| CL1168                     | <i>xthA::cat</i>                                                                                                                         | SR108 x P1 (CL1155)                                         |
